# Supplementary material for: MoCl5 as a dual-function redox mediator for Li–O2 batteries
Source: Royal Society of Chemistry journal article supplement (doi:10.1039/c9ta03628h), 2019-01-01
Supplement: c9ta03628h1.pdf [file c9ta03628h1.pdf]

Electronic Supplementary Information (ESI)

## MoCl<sub>5</sub> as a Dual-Function Redox Mediator for Li-O<sub>2</sub> Batteries

Xin-Gai Wang,<sup>a</sup> Zihe Zhang,<sup>a</sup> Qinming Zhang,<sup>a</sup> Chengyi Wang,<sup>a</sup> Xin Zhang,<sup>a</sup> Zhaojun Xie,<sup>a</sup> and Zhen Zhou\*<sup>ab</sup>

<sup>a</sup> School of Materials Science and Engineering, Institute of New Energy Material Chemistry, Key Laboratory of Advanced Energy Materials Chemistry (Ministry of Education), Renewable Energy Conversion and Storage Center (ReCast), Nankai University, Tianjin 300350, China.

<sup>b</sup> School of Chemical Engineering and Energy, Zhengzhou University, Zhengzhou 450001, China.

### Corresponding Author

[zhouzhen@nankai.edu.cn](mailto:zhouzhen@nankai.edu.cn)

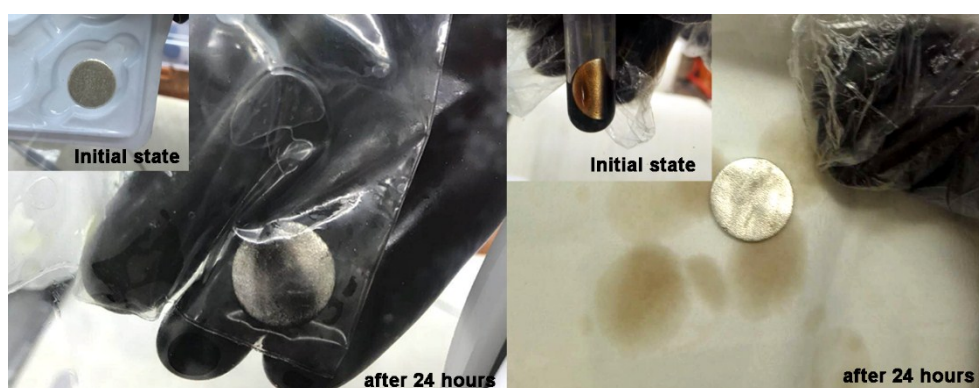

**Fig. S1.** Different states of lithium soaked in the electrolyte containing (left) FeCl<sub>3</sub> or (right) MoCl<sub>5</sub>.

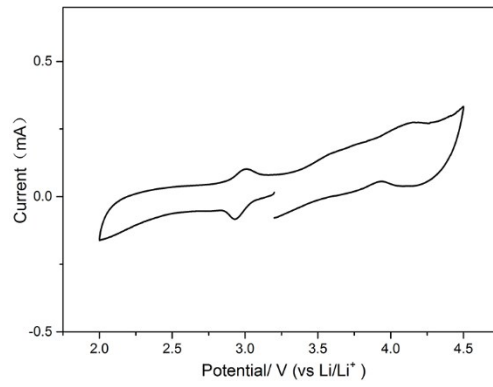

**Fig. S2.** CV curves of Li-O<sub>2</sub> batteries with MoCl<sub>5</sub> under Ar at a scan rate of 0.1 mV/s.

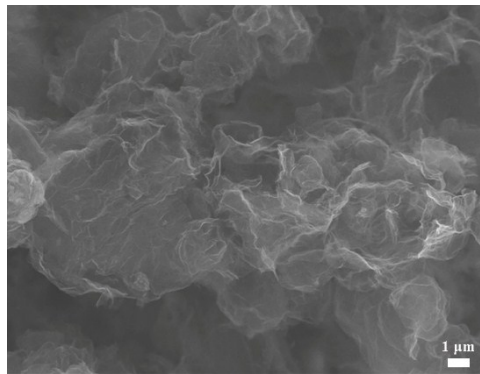

**Fig. S3.** SEM image of graphene cathodes at the initial stage.

**Table S1.** Summary of redox mediators used in Li-O<sub>2</sub> batteries.

| Redox Mediator                | Concentration (M) | Electrolyte | Cathode                                         |                           |                               | Discharge capacity |                                                          |                                                                                    | Cycle Performance |                               | Note                                    | Reference |     |   |
|-------------------------------|-------------------|-------------|-------------------------------------------------|---------------------------|-------------------------------|--------------------|----------------------------------------------------------|------------------------------------------------------------------------------------|-------------------|-------------------------------|-----------------------------------------|-----------|-----|---|
|                               |                   |             | Material                                        | Weight                    | Diameter                      | Discharge capacity | Current                                                  | Cycles                                                                             | Current density   | Cutoff capacity               |                                         |           |     |   |
| <b>Organic redox Mediator</b> | TTF               | 0.01        | 1 M LiClO <sub>4</sub> /DMSO                    | Nano porous gold          | 0.15 to 5 mg cm <sup>-2</sup> | Unknown            | —                                                        | —                                                                                  | 100               | 0.078 to 1mA cm <sup>-2</sup> | 300 mAh g <sub>gold</sub> <sup>-1</sup> | OER       | 1   |   |
|                               | TEMPO             | 0.01        | 0.1 M LiTFSI/DME                                | Ketjen black              | 0.3-0.5 mg                    | 10 mm              | —                                                        | —                                                                                  | 50                | 0.1 mA g <sup>-1</sup>        | 500 mA h g <sup>-1</sup>                | OER       | 2   |   |
|                               | MPT               | 0.1         | 1.0 M LiCF <sub>3</sub> SO <sub>3</sub> /TEGDME | Super P and SWCNT         | 0.11–0.15 mg                  | Unknown            | —                                                        | —                                                                                  | 50                | 150 mA g <sup>-1</sup>        | 1000 mA h g <sup>-1</sup>               | OER       | 3   |   |
|                               | DMPZ              | 0.2         | 1.0 M LiTFSI/TEGDME                             | dried gas diffusion layer | Unknown                       | Unknown            | —                                                        | —                                                                                  | 25                | 0.052 mA cm <sup>-2</sup>     | 0.5 mA h cm <sup>-2</sup>               | OER       | 4   |   |
|                               | DBBQ              | 0.01        | 1.0 M LiTFSI/TEGDME or DME                      | gas diffusion layers      | —                             | 4*4 mm             | ~ 400 mA h m <sup>-2</sup><br>~ 440 mA h m <sup>-2</sup> | 0.2 mA cm <sub>real</sub> <sup>-2</sup><br>0.1 mA cm <sub>real</sub> <sup>-2</sup> | —                 | —                             | —                                       | —         | ORR | 5 |
|                               | CoQ <sub>10</sub> | 0.01        | 1.0 M LiTFSI/TEGDME                             | Super P                   | 0.7 mg                        | 12 mm              | 570 mA h m <sup>-2</sup>                                 | 0.1 mA cm <sup>-2</sup>                                                            | —                 | —                             | —                                       | —         | ORR | 6 |

| <b>Metal Complex</b>            |                |                                          |                                   |                              |          |                                                       |                                         |                       |                                    |                             |             |    |
|---------------------------------|----------------|------------------------------------------|-----------------------------------|------------------------------|----------|-------------------------------------------------------|-----------------------------------------|-----------------------|------------------------------------|-----------------------------|-------------|----|
| FePc                            | 0.002          | 0.1 M LiTFSI/DMSO                        | Carbon fiber with Fe-N/C Graphene | 0.25 mg cm <sup>-2</sup>     | Unknown  | ~ 3600 mAh g <sup>-1</sup> (Carbon fiber with Fe-N/C) | 0.5 mA cm <sup>-1</sup>                 | 135 cycles (graphene) | 0.5 mA cm <sup>-2</sup>            | 1000 mA h g <sup>-1</sup>   | ORR and OER | 7  |
| Heme                            | 0.0023         | 1 M LiClO <sub>4</sub> /TEGDME           | MWCNT                             | Unknown                      | 12.7 mm  | 2,871 mA h g <sup>-1</sup>                            | 100 mA g <sup>-1</sup>                  | 50 cycles             | 200 mA g <sup>-1</sup>             | 600 mA h g <sup>-1</sup>    | ORR and OER | 8  |
| Co(Terp) <sub>2</sub>           | 0.05           | 1.0 M LiTFSI/DME: Pyr <sub>14</sub> TFSI | CNTs                              | 0.4-1.2 mg                   | 10*10 mm | 8200 mA h g <sup>-1</sup>                             | 200 mA g <sup>-1</sup>                  | —                     | —                                  | —                           | OER         | 9  |
| <b>Dual mediators</b>           |                |                                          |                                   |                              |          |                                                       |                                         |                       |                                    |                             |             |    |
| DBBQ+ TEMPO                     | 0.025+0.025    | 0.3 M LiClO <sub>4</sub> /DME            | gas diffusion layers              | Unknown                      | 4mm      | 40mA h cm <sup>-2</sup>                               | 1.0 mA cm <sup>-2</sup> <sub>real</sub> | 50 cycles             | 1.0 mA cm <sup>-2</sup>            | 2 mA h cm <sup>-2</sup>     | ORR and OER | 10 |
| DBBQ+ H <sub>2</sub> O          | 0.01+ 20000ppm | 0.25 M LiTFSI/DME                        | Super P rGO                       | 1 mg cm <sup>-2</sup> 0.1 mg | 4 mm     | ~16 mA h cm <sup>-2</sup> ~18 mA h cm <sup>-2</sup>   | 0.1 mA cm <sup>-2</sup>                 | —                     | —                                  | —                           | ORR         | 11 |
| <b>Inorganic Redox mediator</b> |                |                                          |                                   |                              |          |                                                       |                                         |                       |                                    |                             |             |    |
| LiI                             | 0.05           | 1.0 M LiTFSI/TEGDME                      | CNTs                              | Unknown                      | 12.7 mm  | —                                                     | —                                       | 900 cycles            | 2 A g <sup>-1</sup>                | 1000                        | OER         | 12 |
|                                 | 0.05           | 0.2 M LiTFSI/TEGDME                      | Carbon paper                      | Unknown                      | Unknown  | 4.2 mA h cm <sup>-2</sup>                             | 0.13 mA cm <sup>-2</sup>                | 300 cycles 30 cycles  | 0.052 mA cm <sup>-2</sup>          | 0.052 mA h cm <sup>-2</sup> | OER         | 13 |
| LiBr                            | 0.05           | 0.2 M LiTFSI/DME                         | Carbon paper                      | Unknown                      | Unknown  | ~6.5 mA h cm <sup>-2</sup>                            | 0.13 mA cm <sup>-2</sup>                | 30 cycles             | 0.052 mA cm <sup>-2</sup>          | 0.52 mA h cm <sup>-2</sup>  | OER         | 13 |
| RuBr <sub>3</sub>               | 0.1            | 1 M LiTFSI/DMSO                          | Carbon paper                      | Unknown                      | Unknown  | —                                                     | —                                       | ~50 cycles            | 0.052 to 0.208 mA cm <sup>-2</sup> | 0.5 mA h cm <sup>-2</sup>   | OER         | 14 |

---

|                         |              |                                |              |                               |       |                            |                         |                        |                                                  |                            |             |                  |
|-------------------------|--------------|--------------------------------|--------------|-------------------------------|-------|----------------------------|-------------------------|------------------------|--------------------------------------------------|----------------------------|-------------|------------------|
| <b>H<sub>2</sub>O</b>   | Hydrate-melt | LiTFSI LiBETI/H <sub>2</sub> O | Ketjen Black | 0.38 or 0.12 mg               | 7 mm  | 38000 mA h g <sup>-1</sup> | 100 mA g <sup>-1</sup>  | 50                     | 500 mA g <sup>-1</sup>                           | 1000 mA h g <sup>-1</sup>  | ORR and OER | 15               |
| <b>IL-TEMPO</b>         | 1%           | 0.5 M LiTFSI/DEGDME            | Carbon Paper | —                             | 10 mm | 3 25 mA h cm <sup>-2</sup> | 0.1 mA cm <sup>-2</sup> | 100                    | 0.1 mA cm <sup>-2</sup>                          | 0.25 mA h cm <sup>-2</sup> | ORR and OER | 16               |
| <b>Anthraquinone</b>    | 10 mM        | 1M LiTFSI/TEGDME               | Ketjen Black | 0.7 ± 0.2 mg cm <sup>-2</sup> | —     | 11000 mA h g <sup>-1</sup> | 0.1 mA cm <sup>-2</sup> | —                      | —                                                | —                          | ORR         | 17               |
| <b>MoCl<sub>5</sub></b> | 0.05         | 1.0 M LiTFSI/TEGDME            | Graphene     | 0.1~0.2 mg                    | 12 mm | 27530 mA h g <sup>-1</sup> | 400 mA g <sup>-1</sup>  | 45 cycles<br>25 cycles | 400 mA g <sup>-1</sup><br>800 mA g <sup>-1</sup> | 1000 mA h g <sup>-1</sup>  | ORR and OER | <b>This work</b> |

---

## References

1. Y. Chen, S. A. Freunberger, Z. Peng, O. Fontaine and P. G. Bruce, *Nat. Chem.*, 2013, **5**, 489.
2. B. J. Bergner, A. Schurmann, K. Peppler, A. Garsuch and J. Janek, *J. Am. Chem. Soc.*, 2014, **136**, 15054.
3. N. Feng, X. Mu, X. Zhang, P. He and H. Zhou, *ACS Appl. Mater. Interfaces*, 2017, **9**, 3733.
4. S. H. Lee, J. B. Park, H. S. Lim and Y. K. Sun, *Adv. Energy Mater.*, 2017, **7**, 1602417.
5. D. Aurbach, B. D. McCloskey, L. F. Nazar and P. G. Bruce, *Nat. Energy*, 2016, **1**, 16128.
6. Y. Zhang, L. Wang, X. Zhang, L. Guo, Y. Wang and Z. Peng, *Adv. Mater.*, 2018, **30**, 1705571.
7. D. Sun, Y. Shen, W. Zhang, L. Yu, Z. Yi, W. Yin, D. Wang, Y. Huang, J. Wang, D. Wang and J. B. Goodenough, *J. Am. Chem. Soc.*, 2014, **136**, 8941.
8. W. H. Ryu, F. S. Gittleson, J. M. Thomsen, J. Li, M. J. Schwab, G. W. Brudvig and A. D. Taylor, *Nat. Commun.*, 2016, **7**, 12925.
9. K. P. C. Yao, J. T. Frith, S. Y. Sayed, F. Bardé, J. R. Owen, Y. Shao-Horn and N. Garcia-Araez, *J. Phys. Chem. C*, 2016, **120**, 16290.
10. X. W. Gao, Y. H. Chen, L. R. Johnson, Z. P. Jovanov and P. G. Bruce, *Nat. Energy*, 2017, **2**, 17118.
11. T. Liu, J. T. Frith, G. Kim, R. N. Kerber, N. Dubouis, Y. Shao, Z. Liu, P. Magusin, M. T. L. Casford, N. Garcia-Araez and C. P. Grey, *J. Am. Chem. Soc.*, 2018, **140**, 1428.
12. H. D. Lim, H. Song, J. Kim, H. Gwon, Y. Bae, K. Y. Park, J. Hong, H. Kim, T. Kim, Y. H. Kim, X. Lepro, R. Ovalle-Robles, R. H. Baughman and K. Kang, *Angew. Chem. Int. Ed.* 2014, **53**, 3926.
13. W. J. Kwak, D. Hirshberg, D. Sharon, M. Afri, A. A. Frimer, H. G. Jung, D. Aurbach and Y. K. Sun, *Energy Environ. Sci.*, 2016, **9**, 2334.
14. S. H. Lee, W.-J. Kwak and Y.-K. Sun, *J. Mater. Chem. A*, 2017, **5**, 15512.
15. S. Wu, Y. Qiao, S. Yang, J. Tang, P. He and H. Zhou, *ACS Catal.*, 2018, **8**, 1082.
16. J. Zhang, B. Sun, Y. Zhao, A. Tkacheva, Z. Liu, K. Yan, X. Guo, A. M. McDonagh, D. Shanmukaraj, C. Wang, T. Rojo, M. Armand, Z. Peng, G. Wang, *Nat. Commun.* 2019, **10**, 602.
17. P. Zhang, L. Liu, X. He, X. Liu, H. Wang, J. He and Y. Zhao, *J. Am. Chem. Soc.*, 2019, **141**, 6263.
